# Supplementary material for: Eulytite-type Ba3Yb(PO4)3:Tm/Er/Ho as a high sensitivity optical thermometer over a broad temperature range
Source: Royal Society of Chemistry journal article supplement (doi:10.1039/d3tc03663d), 2023-12-07
Supplement: d3tc03663d1.pdf [file d3tc03663d1.pdf]

# Supporting Information

## **Eulytite-type $\text{Ba}_3\text{Yb}(\text{PO}_4)_3$ : Tm/Er/Ho as high sensitivity optical thermometer over broad temperature range**

Zonghao Lei<sup>a, 1</sup>, Houhe Dong<sup>a, 1</sup>, Lijie Sun<sup>a</sup>, Bing Teng<sup>a, b, c\*</sup>, Yanfei Zou<sup>a</sup>, Degao Zhong<sup>a, b, c\*</sup>

<sup>a</sup> College of Physics, University-Industry Joint Center for Ocean Observation and Broadband Communication, Qingdao University, Qingdao 266071, China

<sup>b</sup> National Demonstration Center for Experiment Applied Physics Education (Qingdao University), Qingdao 266071, China

<sup>c</sup> Weihai Innovation Research Institute of Qingdao University, Weihai 264200, China

<sup>1</sup> These authors contributed equally to this work

\* Corresponding author.

Email: [zhdg2008@126.com](mailto:zhdg2008@126.com) (Degao Zhong), [5108tb@163.com](mailto:5108tb@163.com) (Bing Teng)

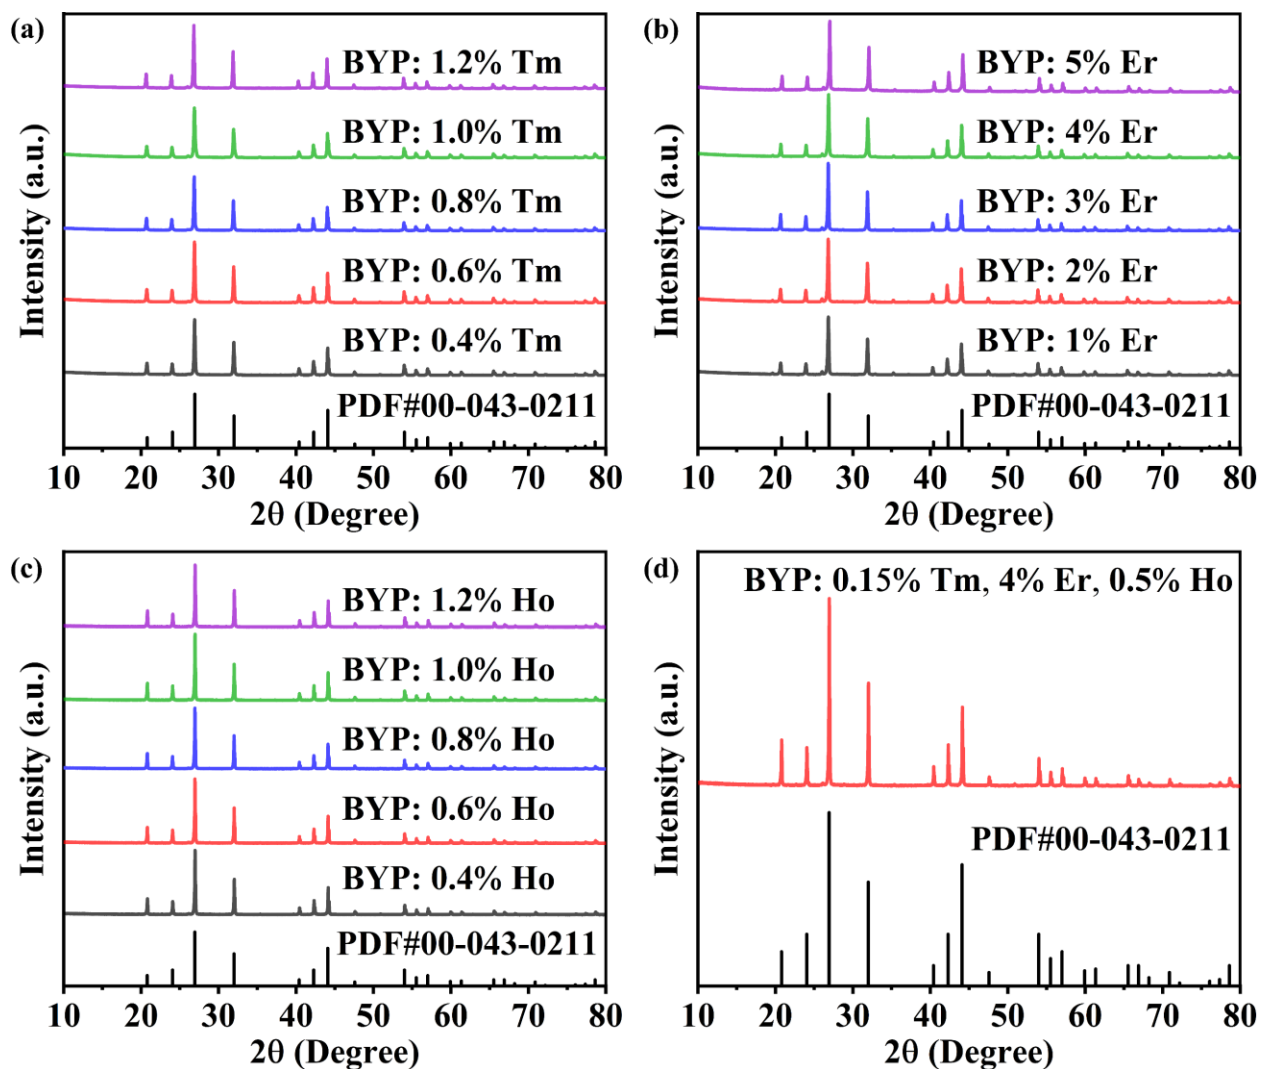

**Fig. S1.** XRD patterns of (a) Ba<sub>3</sub>Yb(PO<sub>4</sub>)<sub>3</sub>: Tm<sup>3+</sup>, (b) Ba<sub>3</sub>Yb(PO<sub>4</sub>)<sub>3</sub>: Er<sup>3+</sup>, (c) Ba<sub>3</sub>Yb(PO<sub>4</sub>)<sub>3</sub>: Ho<sup>3+</sup>, and (d) Ba<sub>3</sub>Yb(PO<sub>4</sub>)<sub>3</sub>: 0.15% Tm<sup>3+</sup>, 4% Er<sup>3+</sup>, 0.5% Ho<sup>3+</sup> phosphors.

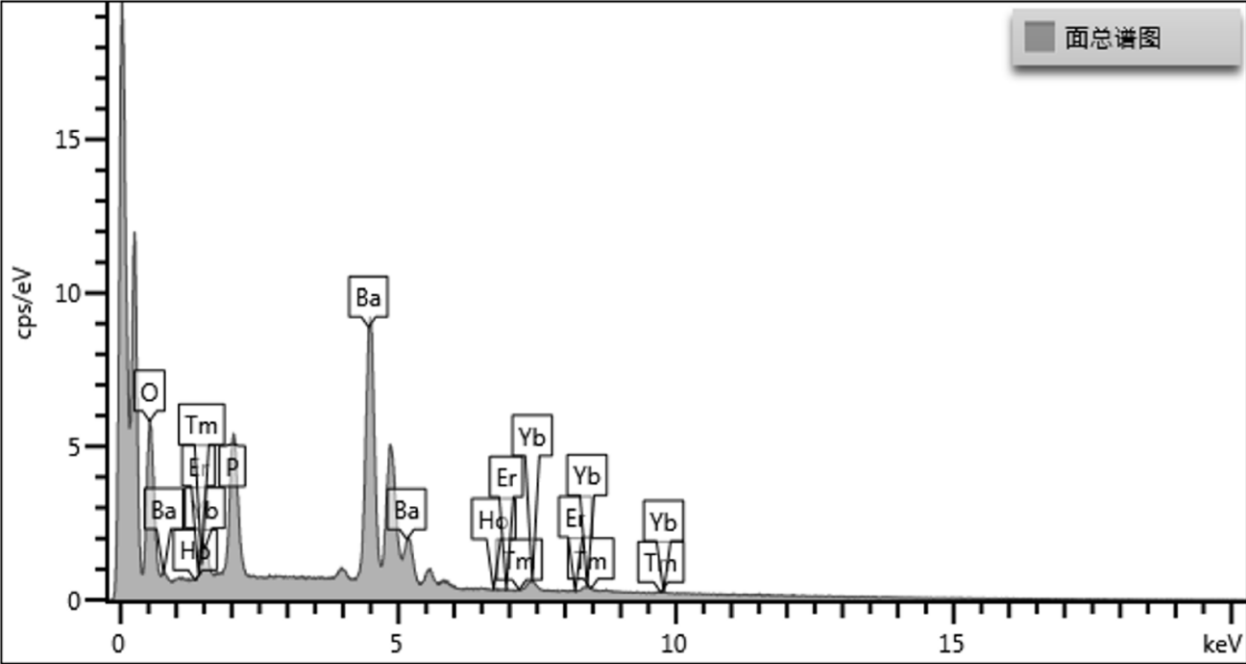

Fig. S2. EDS spectrum of Ba<sub>3</sub>Yb(PO<sub>4</sub>)<sub>3</sub>: 0.15% Tm<sup>3+</sup>, 4% Er<sup>3+</sup>, 0.5% Ho<sup>3+</sup> single phase powders.

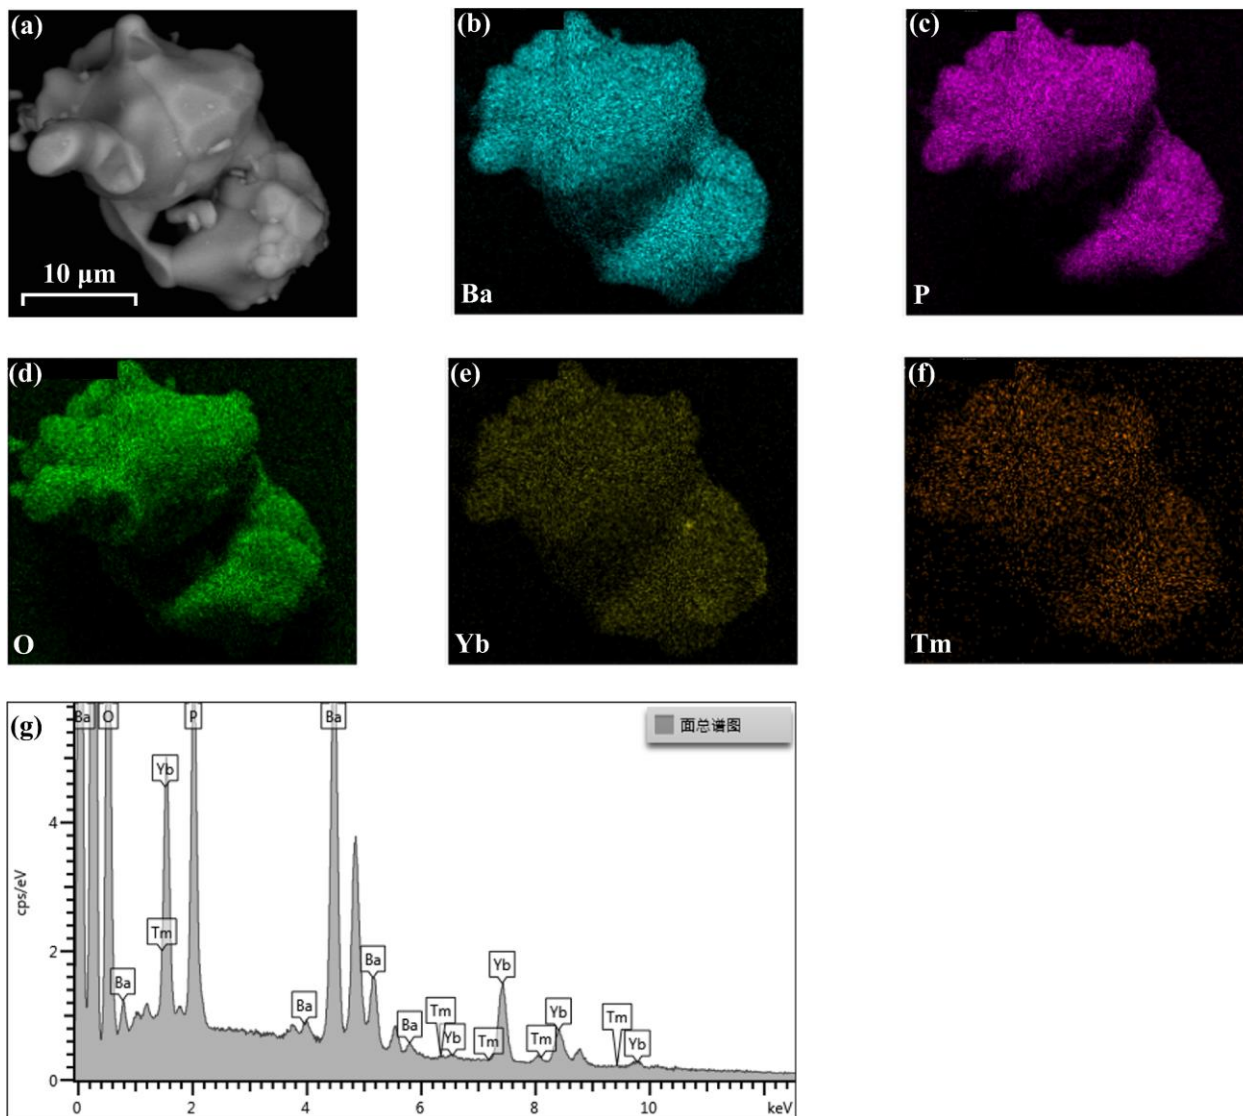

**Fig. S3.** (a) SEM image, (b-f) elemental mapping images and (g) EDS spectrum of  $\text{Ba}_3\text{Yb}(\text{PO}_4)_3:0.8\% \text{Tm}^{3+}$  single phase powders.

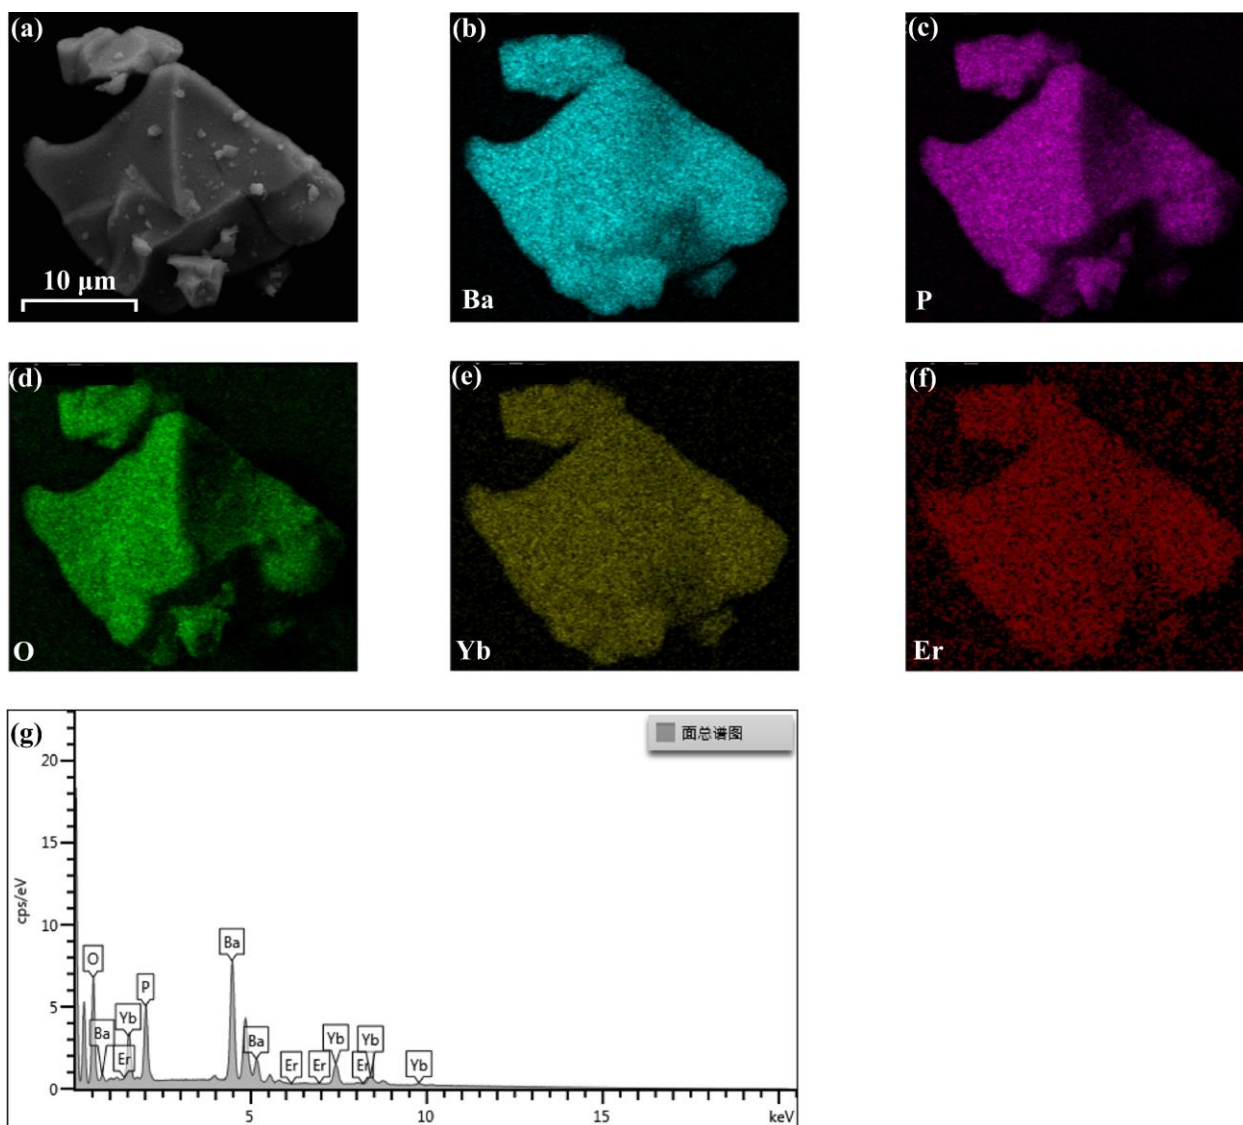

**Fig. S4.** (a) SEM image, (b-g) elemental mapping images and (h) EDS spectrum of  $\text{Ba}_3\text{Yb}(\text{PO}_4)_3:4\% \text{Er}^{3+}$  single phase powders.

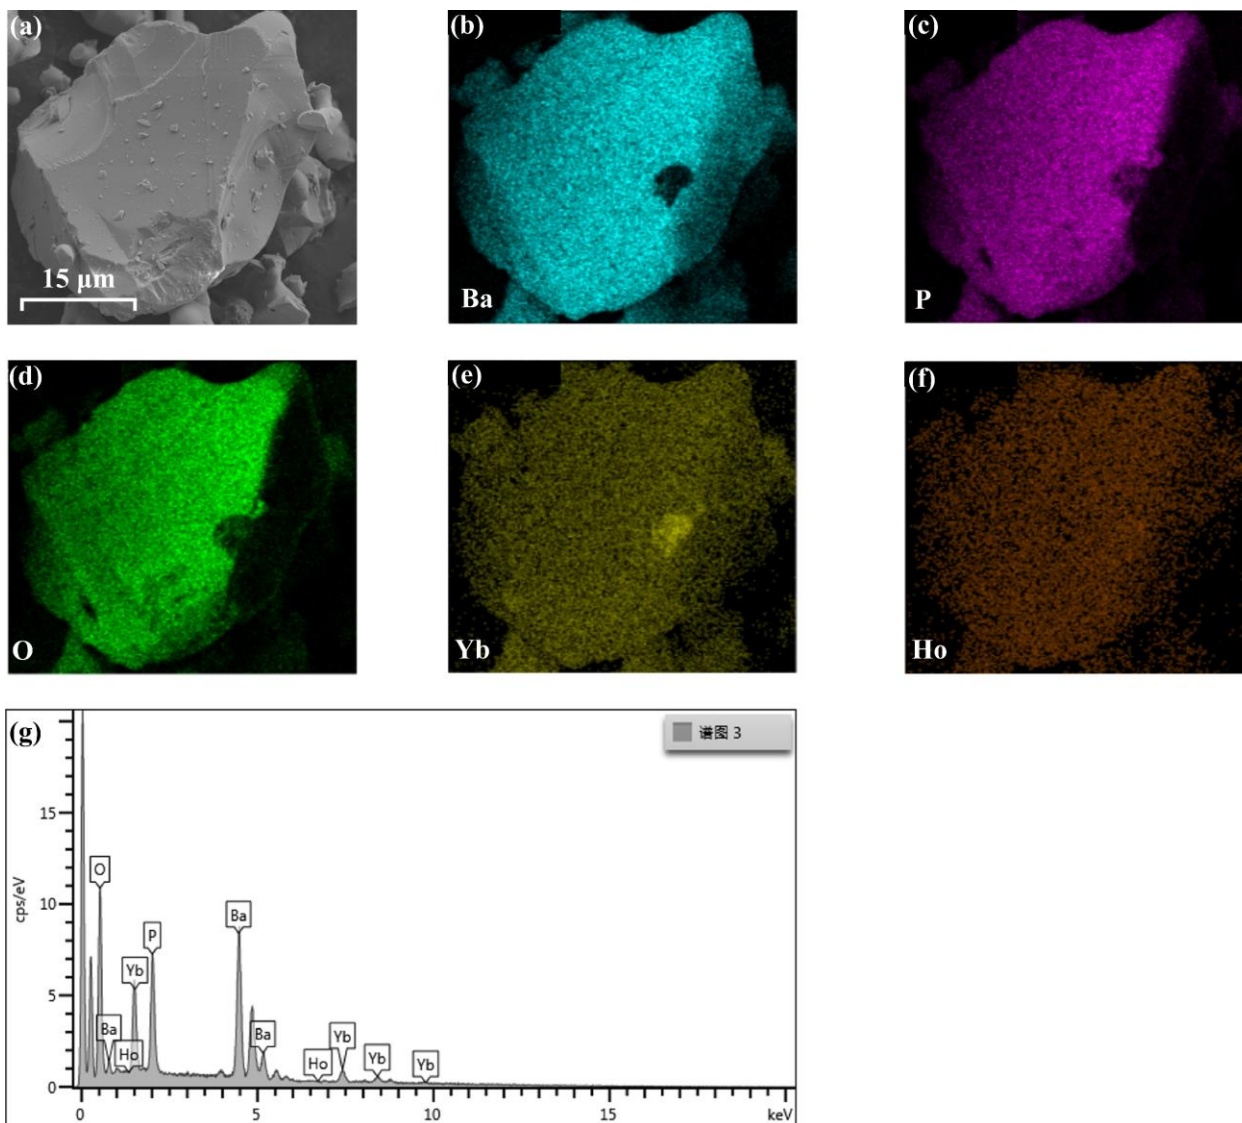

**Fig. S5. (a)** SEM image, **(b-g)** elemental mapping images and **(h)** EDS spectrum of  $\text{Ba}_3\text{Yb}(\text{PO}_4)_3$ : 1%  $\text{Ho}^{3+}$  single phase powders.

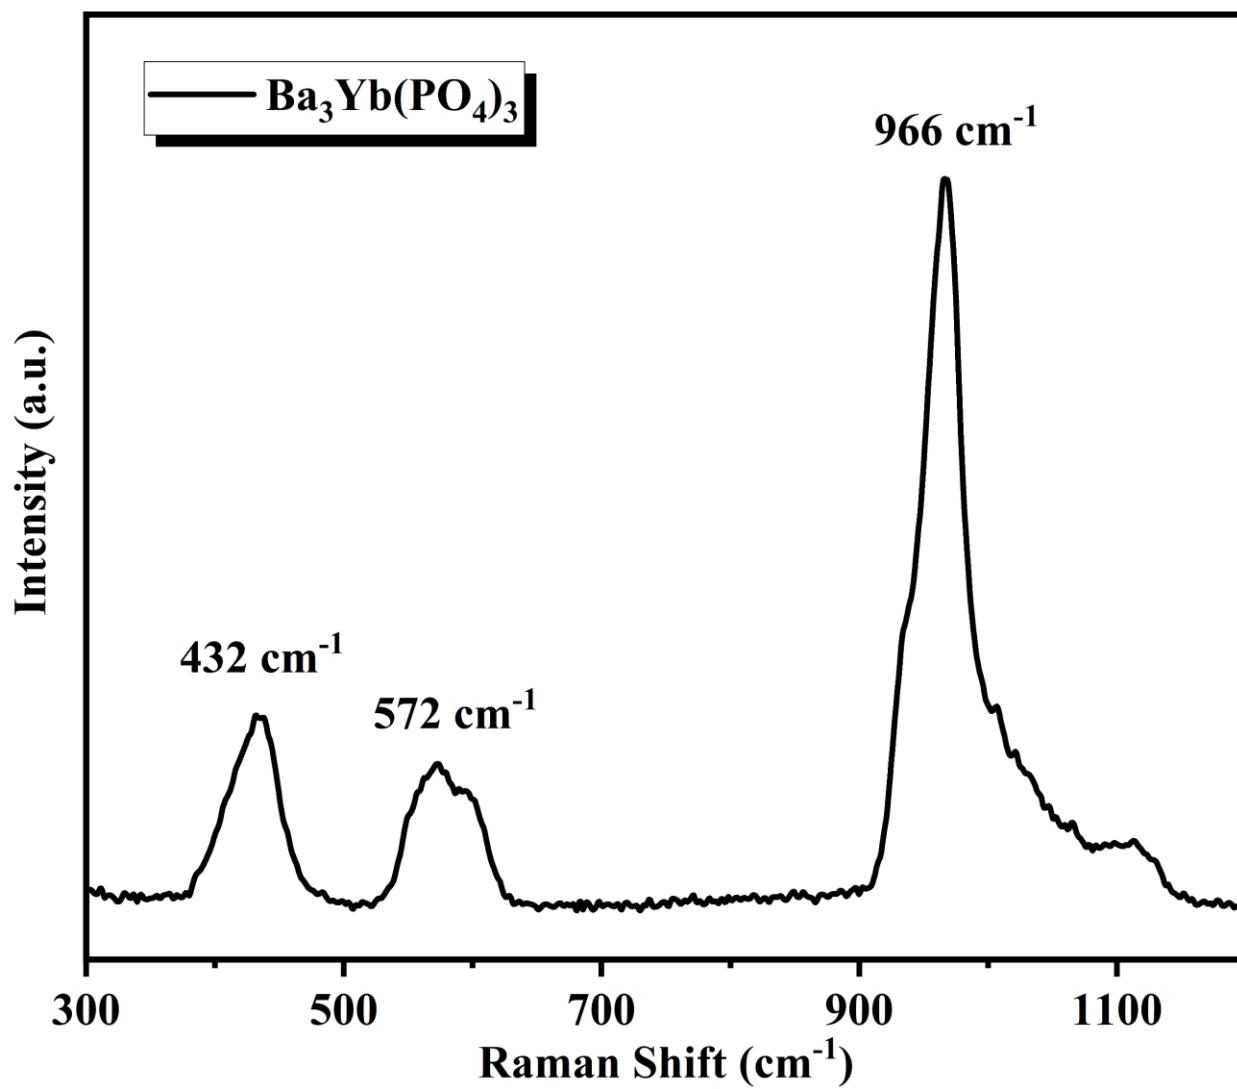

Fig. S6. Raman spectrum of the  $\text{Ba}_3\text{Yb}(\text{PO}_4)_3$  host.

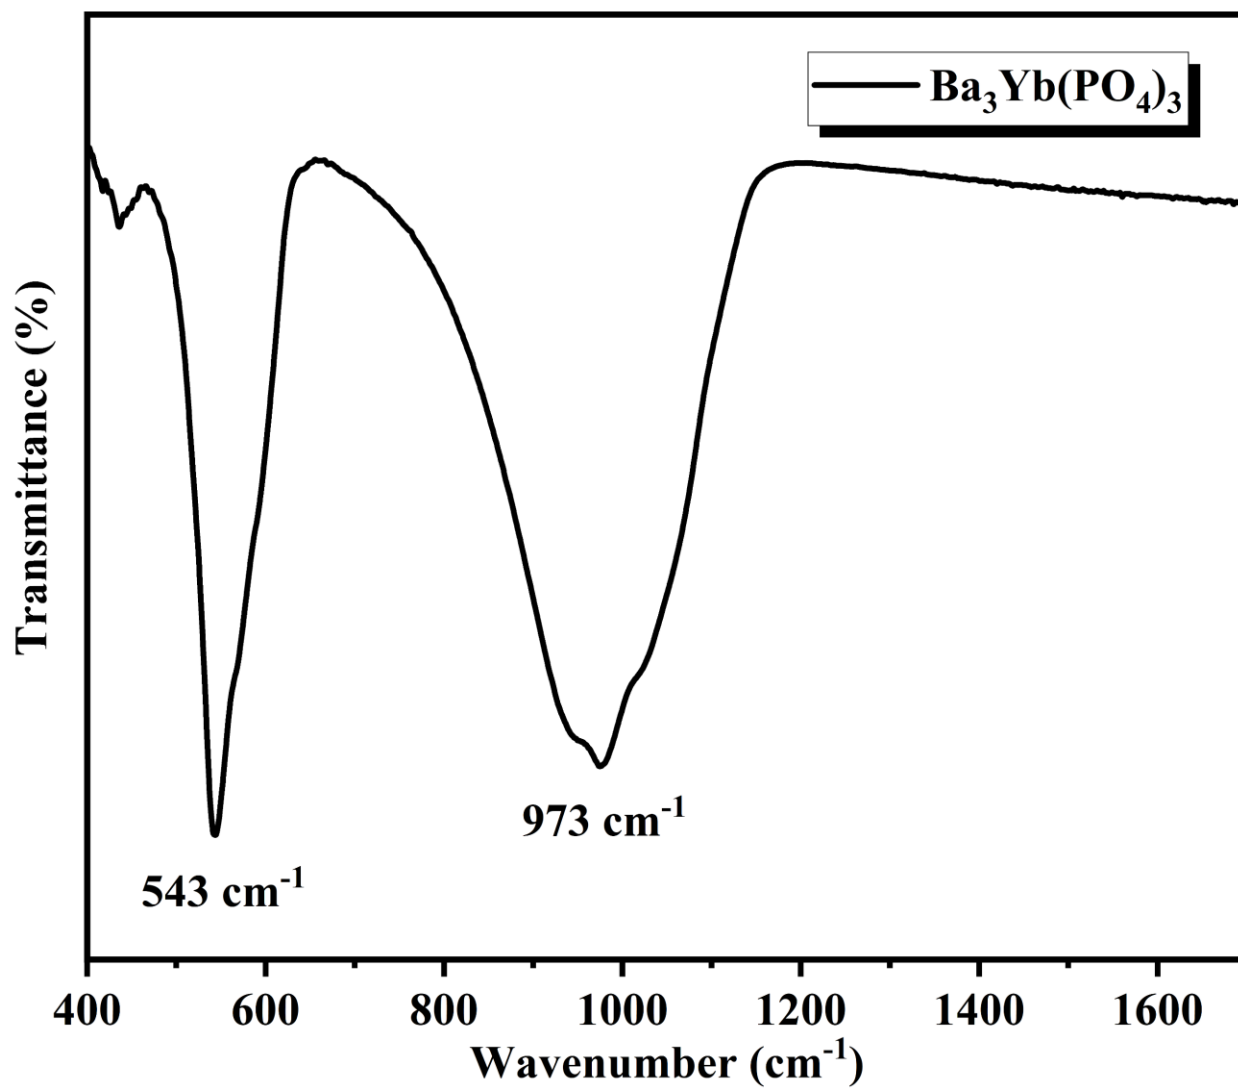

Fig. S7. FT-IR spectrum of the  $\text{Ba}_3\text{Yb}(\text{PO}_4)_3$  host.



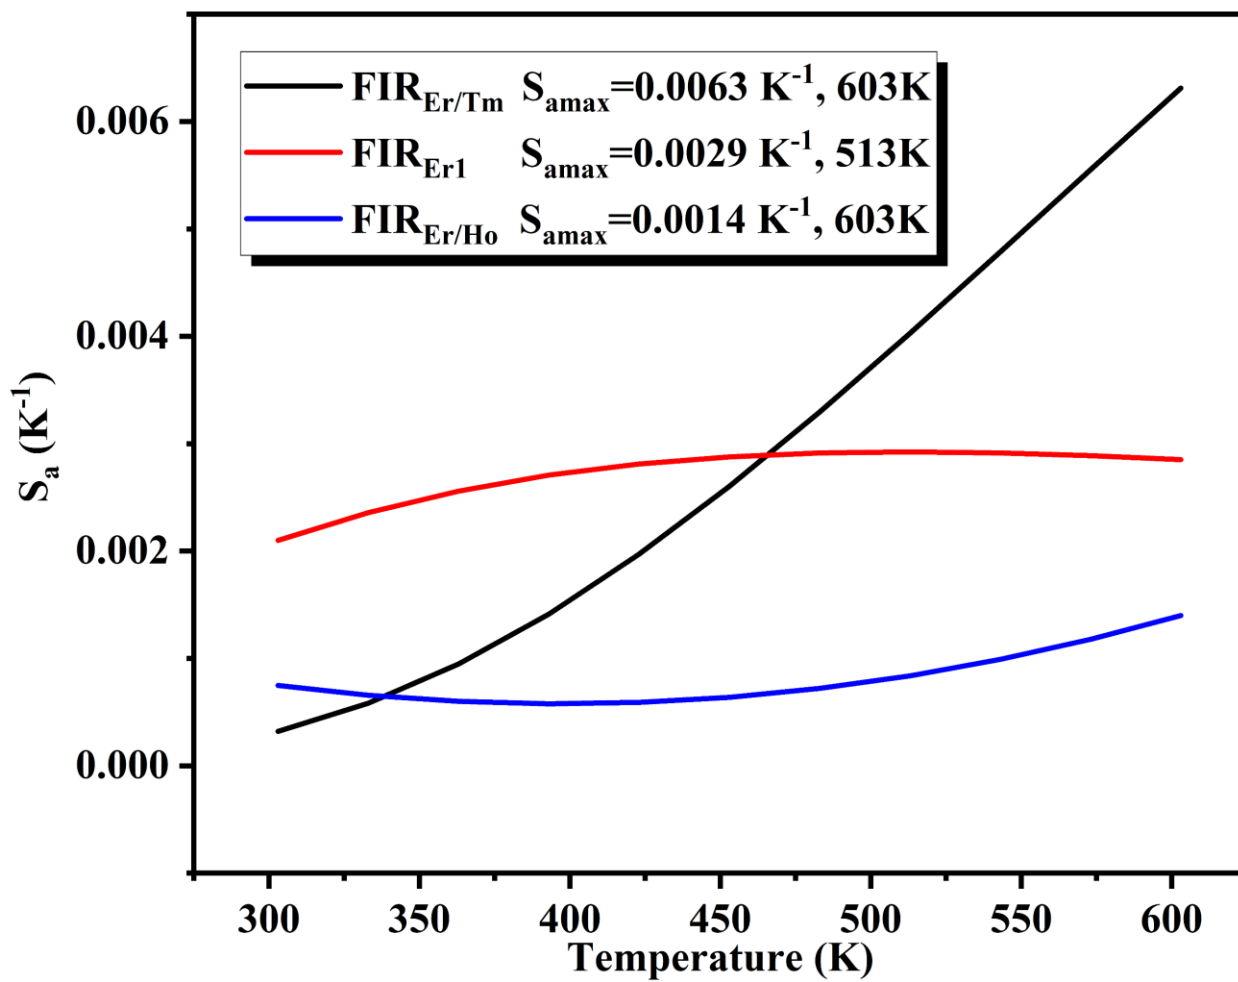

**Fig. S8.**  $S_a$  values of  $Ba_3Yb(PO_4)_3: 0.15\% Tm^{3+}, 4\% Er^{3+}, 0.5\% Ho^{3+}$  phosphor.

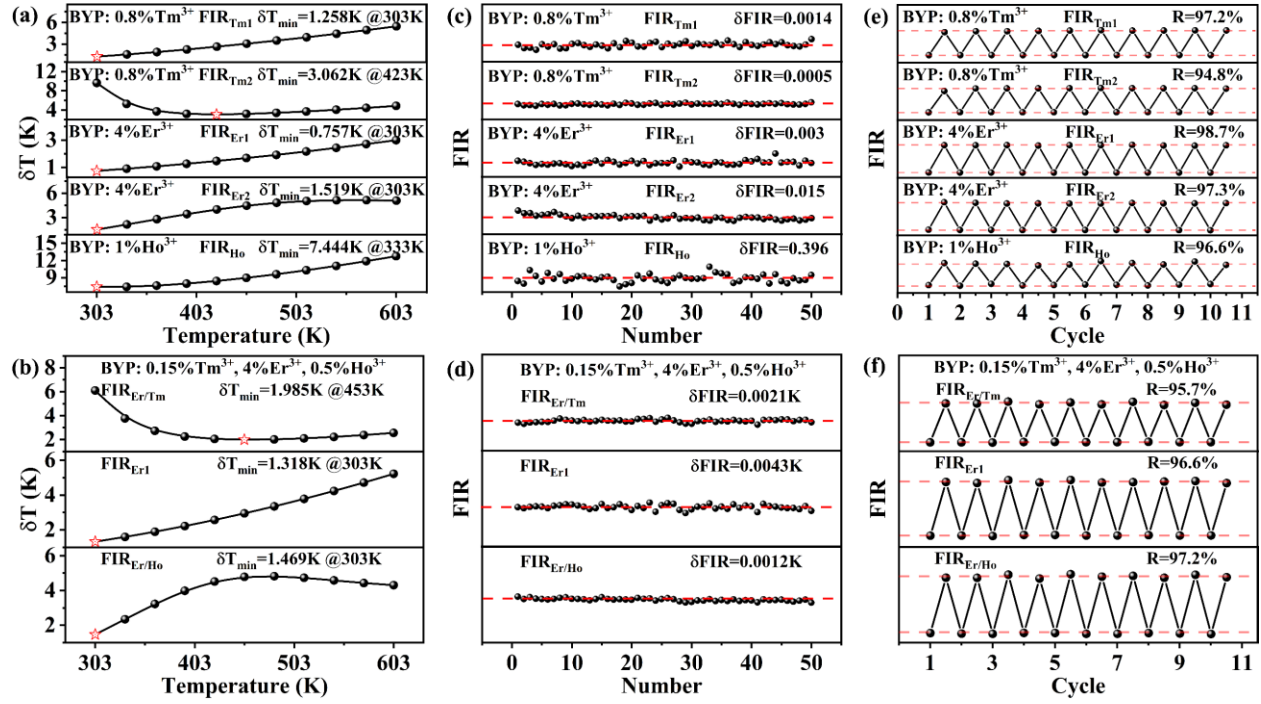

**Fig. S9 (a and b)** The calculation results of  $\delta T$ , **(c and d)** recorded FIR 50 times consecutively at 303 K, and **(e and f)** repeatability cycles between 303 to 603 K of BYP: 0.8% Tm<sup>3+</sup>, BYP: 4% Er<sup>3+</sup>, BYP: 1% Ho<sup>3+</sup> and BYP: 0.15% Tm<sup>3+</sup>, 4% Er<sup>3+</sup>, 0.5% Ho<sup>3+</sup>.

**Table S1. Refined crystallographic parameters of Ba<sub>3</sub>Yb(PO<sub>4</sub>)<sub>3</sub> host.**

| Ions | Wyckoff sites | x       | y       | z       | Occupancy |
|------|---------------|---------|---------|---------|-----------|
| Ba1  | 16c           | 0.06566 | 0.06566 | 0.06566 | 0.21718   |
| Yb1  | 16c           | 0.04731 | 0.04731 | 0.04731 | 0.02581   |
| P1   | 12a           | 0.37500 | 0       | 0.25000 | 0.21022   |
| O1   | 48e           | 0.28993 | 0.95317 | 0.36018 | 0.76011   |
| O2   | 48e           | 0.27901 | 0.02863 | 0.41505 | 0.23249   |
